# Supplementary material for: Insights Into the Resistome of Bovine Clinical Mastitis Microbiome, a Key Factor in Disease Complication
Source: Front Microbiol. 2020 Jun 3;11:860. doi: 10.3389/fmicb.2020.00860 (PMC7283587; doi:10.3389/fmicb.2020.00860)
Supplement: Supplementary file 2 [file Data_Sheet_2.XLSX]

## Sheet: Supplementary Data 2
	Resistome diversity in bovine clinical mastitis microbiome, a signature concurrence
	M. Nazmul Hoque, Arif Istiaq, Rebecca A. Clement, Keylie M. Gibson, Otun Saha, Ovinu Kibria Islam, Ruhshan Ahmed Abir, Munawar Sultana, AMAM Zonaed Siddiki, Keith A. Crandall, M. Anwar Hossain
			Metabolic Functional Genomics(KEGG Pathways and SEED Subsystem Analysis)
			Resistance to antibiotics and toxic compounds (RATC)
												RATC genes and their abundance in microbiomes found in different breeds
		Sl. No.	RATC Genes	No. of Aliigned Reads	Relative_Abundance	Samples_Name	Samples_ID	Reads assigned to Bacterial genes	Reads assigned to RATC genes				Relative Abundance
		1	Multidrug_Resistance_Efflux_Pumps (MREP)	41175	28.6045	Ctg1C7	CM1	556	15	Pearson Correlation, p=0.001, Nonparametric Spearman's Correlation, p=0.003			Genes	XHF	SW	RCC	LZ
		2	Cobalt-zinc-cadmium_resistance (CZCR)	27797	19.3107	Ctg2C3	CM2	1133	42				MREP	35.4458	28.6484	15.7143	31.245
		3	Copper_homeostasis (CH)	13794	9.58276	Ctg2C5	CM3	990	28				CZCR	14.3258	20.7235	30	18.5898
		4	Multidrug_efflux_pump_in_Campylobacter_jejuni_(CmeABC operon)	12796	8.88944	Ctg2C7	CM4	1238	35				CmeABC Operon	11.2173	8.16916	4.28571	8.38364
		5	Resistance_to_fluoroquinolones (RFL)	8946	6.21483	Ctg3C2	CM5	237	4				RFL	7.1811	6.18146	7.14286	6.62946
		6	The_mdtABCD_multidrug_resistance_cluster (mdtABCD)	7943	5.51804	Ctg3C3	CM6	4445	178				CH	6.34583	8.78672	15	8.28113
		7	Methicillin_resistance_in_Staphylococci (MRS)	5524	3.83755	Ctg3C4	CM7	957	28				mdtABCD	5.95342	5.7588	2.85714	4.82971
		8	BlaR1_Family_Regulatory_Sensor-transducer_Disambiguation (BlaR1)	4947	3.43671	Ctg3C5	CM8	1266	60				MRS	4.28567	3.41067	0.714286	3.88427
		9	Arsenic_resistance (AR)	4117	2.8601	Ctg3C8	CM9	1698	44				BlaR1	3.5429	3.17468	8.57143	2.77936
		10	MexE-MexF-OprN_Multidrug_Efflux_System (OprN)	3464	2.40646	D3C5	CM10	1148	38				AR	2.76929	2.86003	2.14286	3.4742
		11	Copper_homeostasis:_copper_tolerance (CHCT)	3367	2.33907	D4C4	CM11	2985	96				RCHC	1.77145	1.17172	0.714286	1.57193
		12	Beta-lactamase (BLAC)	3152	2.18971	G3C1	CM12	745976	9550				CHCT	1.71259	1.83507	4.28571	1.69723
		13	Resistance_to_chromium_compounds (RCHC)	2022	1.40469	G1C4	CM13	426098	8656				ZR	0.992236	0.0633996	1.42857	0.0227816
		14	Bile_hydrolysis BH)	1121	0.778764	G1C5	CM14	350298	11				BLAC	0.821257	2.37514	2.85714	2.71101
		15	Resistance_to_Vancomycin (RVAN)	742	0.515471	G1C6	CM15	433	13716				RVAN	0.711943	0.521286	0	0.444242
		16	Adaptation_to_d-cysteine (ADCYS)	629	0.436969	G3C2	CM16	3128775	92738				OprN	0.591417	3.36605	2.85714	2.2326
		17	Lysozyme_inhibitors (LI)	575	0.399455	G3C5	CM17	611600	11139				ADCYS	0.484906	0.475497	0.001	0.296161
		18	Zinc_resistance (ZR)	417	0.289692	G3C12	CM18	2088	23				AADNYL	0.400818	0.159673	0	0.523978
		19	Mercury_resistance_operon (MROP)	329	0.228558	M1C3	CM19	6939	307				BH	0.389607	1.02261	0.714286	0.899875
		20	Multiple_Antibiotic_Resistance_MAR_locus (MAR locus)	319	0.221611	M1C4	CM20	428034	6810				MAR Locus	0.36438	0.162021	0.227816	0.227816
		21	Streptothricin_resistance (STR)	311	0.216053	M1C5	CM21	942	31				LI	0.330745	0.479019	0	0.523978
		22	Aminoglycoside_adenylyltransferases (AADNYL)	243	0.168813	M1C6	CM22	2016	220				MROP	0.128935	0.280602	0.714286	0.296161
		23	Erythromycin_resistance (ER)	87	0.0604393	S1C3	CM23	1216	118				MRD	0.0812849	0.0129147	0	0.0455633
		24	Mercuric_reductase (MR)	45	0.0312617	S1C4	CM24	1727	38				ER	0.0532556	0.0680959	0	0.0797357
		25	Fosfomycin_resistance (FR)	39	0.0270935	S1C8	CM25	705	39				FR	0.0336351	0.0281776	0.001	0
		26	Polymyxin_Synthetase_Gene_Cluster_in_Bacillus (PSGCB)	19	0.0131994				143964				CDR	0.0280293	0.00234813	0.001	0
		27	MexA-MexB-OprM_Multidrug_Efflux_System (OprM)	12	0.00833646								STR	0.0280293	0.241858	0.0280293	0.307552
		28	Cadmium_resistance (CDR)	10	0.00694705								mdtRP	0.00280293	0.00117407	0	0
		29	Multidrug_Resistance_Operon_mdtRP_of_Bacillus (mdtRP)	2	0.00138941								OprM	0.003	0.021	0.031	0.012
		30	Streptococcus_pneumoniae_Vancomycin_Tolerance_Locus (SPVTL)	2	0.00138941								PSGCB	0.00280293	0.0187851	0.227816	0.0227816
													SPVTL	0.00280293	0.00117407	0.001	0.002
			RATC Genes in S. aureus
												Association of antimicrobial resistance, biofilm formation and flagellar activity
		Sl. No.	Antibiotic resistance genes	Abundance	Samples_Name	Samples_ID	Reads assigned to antibiotics resistance	Reads assigned totoxic compounds resistance	Pearson Correlation, p=0.01
		1	Methicillin resistance in Staphylococci	37.03	Ctg1C7	CM1	5	10
		2	Resistance to fluoroquinolones	14.81	Ctg2C3	CM2	19	23
		3	Multidrug resistance to efflux pumps	11.11	Ctg2C5	CM3	14	14
		4	BlaR1 family regulatory sensor-transducer disambiguation	3.7	Ctg2C7	CM4	19	16
					Ctg3C2	CM5	4	0				RATC-Genes	No.of Reads Aligned	BF and QS genes	No.of Reads Aligned	Pearson Correlation, p=0.0001						BF and QS genes	Relative_Abundance	function	Relative Abundance		Pearson Correlation, p=0.004
			Metal resistance genes		C3Ctg3	CM6	117	61				Multidrug_Resistance_Efflux_Pumps (MREP)	41175	Autoinducer 2 (AI-2) transport and processing (lsrACDBFGE operon)	1038							Autoinducer 2 (AI-2) transport and processing (lsrACDBFGE operon)	33.7451	Flagellar hook-length control protein FliK	27.1685
		5	Copper homeostasis	11.11	Ctg3C4	CM7	16	12				Cobalt-zinc-cadmium_resistance (CZCR)	27797	Biofilm adhesin biosynthesis (BAB)	744							Biofilm adhesin biosynthesis (BAB)	24.1873	Flagellar M-ring protein FliF	5.61943
		6	Mercuric reductase	11.11	Ctg3C5	CM8	22	38				Copper_homeostasis (CH)	13794	Protein YjgK cluster linked to biofilm formation (YjgK cluster)	476							Protein YjgK cluster linked to biofilm formation (YjgK cluster)	15.4746	Flagellar regulatory protein FleQ	5.33201
		7	Arsenic resistance	3.7	Ctg3C8	CM9	28	16				Multidrug_efflux_pump_in_Campylobacter_jejuni_(CmeABC operon)	12796	Quorum sensing: autoinducer-2 synthesis (QSAU2)	290							Quorum sensing: autoinducer-2 synthesis (QSAU2)	9.42783	Flagellar P-ring protein FlgI	4.25234
		8	Cadmium resistance	3.7	D3C5	CM10	11	27				Resistance_to_fluoroquinolones (RFL)	8946	Quorum sensing regulation in Pseudomonas (QSRP)	279							Quorum sensing regulation in Pseudomonas (QSRP)	9.07022	Flagellar hook-associated protein FlgL	3.6296
		9	Cobalt-zinc-cadmium resistance	3.7	D4C4	CM11	45	51				The_mdtABCD_multidrug_resistance_cluster (mdtABCD)	7943	Quorum sensing in Yersinia (QSY)	136							Quorum sensing in Yersinia (QSY)	4.42133	Flagellar hook protein FlgE	3.6038
					G3C1	CM12	5857	3693				Methicillin_resistance_in_Staphylococci (MRS)	5524	Acyl homoserine lactone (AHL) autoinducer quorum sensing (AHL)	74							Acyl homoserine lactone (AHL) autoinducer quorum sensing (AHL)	2.40572	Flagellar biosynthesis protein FlhA	3.57432
			RATC Genes in E. coli		G1C4	CM13	5581	3075				BlaR1_Family_Regulatory_Sensor-transducer_Disambiguation (BlaR1)	4947	Biofilm formation in Staphylococcus (BFS)	22							Biofilm formation in Staphylococcus (BFS)	0.715215	Flagellar hook-associated protein FliD	2.91473
					G1C5	CM14	7	4				Arsenic_resistance (AR)	4117	Quorum-sensing in Vibrio (QSV)	9							Quorum-sensing in Vibrio (QSV)	0.292588	Flagellar biosynthesis protein FliL	2.75997
					G1C6	CM15	9328	4388				MexE-MexF-OprN_Multidrug_Efflux_System (OprN)	3464	Symbiotic colonization and sigma-dependent biofilm formation gene cluster (SCSIG)	8							Symbiotic colonization and sigma-dependent biofilm formation gene cluster (SCSIG)	0.260078	Flagellar motor switch protein FliG	2.6052
		Sl. No.	Antibiotic resistance genes	Abundance	G3C2	CM16	57100	35638				Copper_homeostasis:_copper_tolerance (CHCT)	3367											Flagellar protein FlgJ [peptidoglycan hydrolase] (EC 3.2.1.-)	2.50571
		1	Multidrug resistance to efflux pumps	28.5	G3C5	CM17	7536	3603				Beta-lactamase (BLAC)	3152											Flagellar basal-body rod protein FlgF	2.42096
		2	The mdtABCD multidrug resistance cluster	17.54	G3C12	CM18	16	7				Resistance_to_chromium_compounds (RCHC)	2022											Flagellar basal-body rod protein FlgG	2.29567
		3	BlaR1 family regulatory sensor-transducer disambiguation	5.96	M1C3	CM19	229	78				Bile_hydrolysis BH)	1121											Flagellar sensor histidine kinase FleS	2.09669
		4	Multidrug efflux pump in Campylobacter jejuni (CmeABC operon)	9.13	M1C4	CM20	4754	2056				Resistance_to_Vancomycin (RVAN)	742											Flagellar basal-body P-ring formation protein FlgA	1.97509
		5	Methicillin resistance in Staphylococci	2.49	M1C5	CM21	16	15				Adaptation_to_d-cysteine (ADCYS)	629											Flagellar assembly protein FliH	1.88665
		6	Multiple antibiotic resistance MAR locus	2.05	M1C6	CM22	90	130				Lysozyme_inhibitors (LI)	575											Flagellar motor rotation protein MotB	1.74294
		7	Beta-lactamase	1.26	S1C3	CM23	67	51				Zinc_resistance (ZR)	417											Flagellar biosynthesis protein FliP	1.72452
		8	Resistance to fluoroquinolones	0.39	S1C4	CM24	15	23				Mercury_resistance_operon (MROP)	329											RNA polymerase sigma factor RpoD	1.485
		9	Aminoglycoside adenylyltransferases (Gentamycin resistance)	0.37	S1C8	CM25	11	28				Multiple_Antibiotic_Resistance_MAR_locus (MAR locus)	319											Flagellar synthesis regulator FleN	1.40394
												Streptothricin_resistance (STR)	311											RNA polymerase sigma-54 factor RpoN	1.3892
			Metal resistance genes				90907	53057				Aminoglycoside_adenylyltransferases (AADNYL)	243											Flagellar protein FliJ	1.33761
		10	Cobalt-zinc-cadmium resistance	10.38								Erythromycin_resistance (ER)	87											Flagellar biosynthesis protein FlhF	1.29707
		11	Zinc resistance	5.64								Mercuric_reductase (MR)	45											RNA polymerase sigma factor for flagellar operon	1.25286
		12	Arsenic resistance	4.38								Fosfomycin_resistance (FR)	39											Flagellar biosynthesis protein FlgN	1.23443
		13	Copper homeostasis	4.81								Polymyxin_Synthetase_Gene_Cluster_in_Bacillus (PSGCB)	19											Flagellar biosynthesis protein FliS	1.20495
		15	Copper homeostasis: copper tolerance	2.28								MexA-MexB-OprM_Multidrug_Efflux_System (OprM)	12											Flagellar biosynthesis protein FlhB	0.9986
		16	Adaptation to d-cysteine	1.5								Cadmium_resistance (CDR)	10											Flagellar biosynthesis protein FliO	0.972806
		17	Lysozyme inhibitors	1.39								Multidrug_Resistance_Operon_mdtRP_of_Bacillus (mdtRP)	2											Flagellar basal-body rod modification protein FlgD	0.954381
		18	Bile hydrolysis	1.18								Streptococcus_pneumoniae_Vancomycin_Tolerance_Locus (SPVTL)	2											Flagellar biosynthesis protein FliQ	0.935957
		19	Mercury resistance operon	0.41																				Flagellin protein FlaB	0.902793
		20	Mercuric reductase	0.34																				Flagellar basal-body rod protein FlgB	0.869629
																								Negative regulator of flagellin synthesis FlgM	0.759083
			RATC Genes in Klebsiella spp.																					Flagellar motor switch protein FliM	0.733289
																								Flagellar biosynthesis protein FliC	0.678016
																								Flagellar L-ring protein FlgH	0.508512
		Sl. No.	Antibiotic resistance genes	Abundance																				Flagellar hook-basal body complex protein FliE	0.453239
		1	Multidrug resistance to efflux pumps	28.4		MIC tests of metals (Conc.)																		Flagellin protein FlaA	0.453239
		2	The mdtABCD multidrug resistance cluster	18.93																				Flagellar motor switch protein FliN	0.43113
		3	BlaR1 family regulatory sensor-transducer disambiguation	5.21		Isolates	Cu (CuSO4)	Zn (ZnO)	Cr (K2Cr2O7)															Flagellar basal-body rod protein FlgC	0.379542
		4	Resistance to fluoroquinolones	4.45		S. aureus	33.2	38.1	13.2															Flagellar transcriptional activator FlhC	0.316899
		5	Multiple antibiotic resistance MAR locus	2.41		E. coli	29	19.2	7.8															Flagellar biosynthesis protein FliZ	0.232147
		6	Fosfomycin resistance	1.08		Klebsiella spp.	21.4	22.4	5.8															Negative regulator of flagellin synthesis	0.180559
		7	Multidrug efflux pump in Campylobacter jejuni (CmeABC operon)	0.7		Enterobacter spp.	23.1	19.7	9.4															Flagellar biosynthesis protein FliT	0.176874
		8	Beta-lactamase	0.57		Bacillus spp.	19	27.1	9.3															Flagellar transcriptional activator FlhD	0.14371
						Shigella spp.	7.5	7.5	3.4															Flagellar protein FlhE	0.132655
			Metal resistance genes				MIC Tests of metals (Conc.)																	Flagellin protein FlaG	0.0589579
		9	Cobalt-zinc-cadmium resistance	11.56																				Flagellar protein FlbD	0.0147395
		10	Copper homeostasis: copper tolerance	11.25		Isolates	Co (CoCl2)	Ni (NiCl­2)
		11	Arsenic resistance	10.1		S. aureus	8.7	20.1
		12	Copper homeostasis	2.03		E. coli	10.4	28.2
		13	Adaptation to d-cysteine	1.08		Klebsiella spp.	7.4	26.8
		14	Resistance to chromium compounds	1.02		Enterobacter spp.	17.2	22.1
		15	Lysozyme inhibitors	0.76		Bacillus spp.	15.3	19.3
		16	Zinc resistance	0.44		Shigella spp.	5	3.5
						Bacteria	Abundance in culture	Antibiotic resistance	Pearson Correlation
			RATC Genes in Bacillus spp.			S. aureus	23.9175	26.96	p=0.019
						E. coli	19.9996	24.75
						Klebsiella spp.	18.8396	21.24
		Sl. No.	Antibiotic resistance genes	Abundance		Enterobacter spp.	12.3358	11.85
		1	Multidrug resistance to operon mdtRP of Bacillus	1.57		Bacillus spp.	17.5576	9.8
		2	Resistance to fluoroquinolones	1.57		Shigella spp.	7.34985	5.39
		3	Beta-lactamase	1.57
		4	BlaR1 family regulatory sensor-transducer disambiguation	1.57		Bacteria	Abundance in culture	MIC metals
		5	Polymyxin synthetase gene cluster in Bacillus	0.79		S. aureus	23.9175	22.66	p=0.020
						E. coli	19.9996	18.84
			Metal resistance genes			Klebsiella spp.	18.8396	16.84
		6	Resistance to chromium compounds	85.04		Enterobacter spp.	12.3358	18.3
		7	Adaptation to d-cysteine	5.51		Bacillus spp.	17.5576	18
						Shigella spp.	7.34985	5.4
			RATC Genes in Enterobacter spp.
						Bacteria	Abundance in metagenome	RATC genes abundance
						S. aureus	0.3615	0.283435	p=0.002
						E. coli	80.2367	58.9649
		Sl. No.	Antibiotic resistance genes	Abundance		Klebsiella spp.	12.6215	16.5232
		1	The mdtABCD multidrug resistance cluster	21.36		Enterobacter spp.	2.2839	8.96494
		2	Multidrug resistance to efflux pumps	17.4		Bacillus spp.	3.4109	1.33319
		3	Multidrug efflux pump in Campylobacter jejuni (CmeABC operon)	10.96		Shigella spp.	1.0852	13.9303
		4	Methicillin resistance in Staphylococci	3.04
		5	Beta-lactamase	2.85
		6	Multiple antibiotic resistance MAR locus	2.58
		7	Resistance to fluoroquinolones	1.2
			Metal resistance genes
		8	Cobalt-zinc-cadmium resistance	20.35
		9	Arsenic resistance	7.46
		10	Copper homeostasis	4.42
		11	Mercury resistance operon	2.39
		12	Adaptation to d-cysteine	2.21
		13	Copper homeostasis: copper tolerance	2.12
		14	Bile hydrolysis	1.66
			RATC Genes in Shigella spp.
		Sl. No.	Antibiotic resistance genes	Abundance
		1	Multidrug efflux pump in Campylobacter jejuni (CmeABC operon)	25.62
		2	The mdtABCD multidrug resistance cluster	11.68
		3	BlaR1 family regulatory sensor-transducer disambiguation	8.52
		4	Resistance to fluoroquinolones	7.76
		5	Multidrug resistance to efflux pumps	2.34
		6	Multiple antibiotic resistance MAR locus	0.08
		7	Erythromycin resistance	0.08
			Metal resistance genes
		8	Cobalt-zinc-cadmium resistance	21.02
		9	Arsenic resistance	7.76
		10	Copper homeostasis	6.03
		11	Adaptation to d-cysteine	4.82
		12	Copper homeostasis: copper tolerance	3.69
		13	Zinc resistance	0.6
			Biofilm formation (BF) and Quorum sensing (QS)
		Sl. No.	BF and QS genes	No.of Reads Aligned	Relative_Abundance
		1	Autoinducer 2 (AI-2) transport and processing (lsrACDBFGE operon)	1038	33.7451
		2	Biofilm adhesin biosynthesis (BAB)	744	24.1873
		3	Protein YjgK cluster linked to biofilm formation (YjgK cluster)	476	15.4746
		4	Quorum sensing: autoinducer-2 synthesis (QSAU2)	290	9.42783
		5	Quorum sensing regulation in Pseudomonas (QSRP)	279	9.07022
		6	Quorum sensing in Yersinia (QSY)	136	4.42133
		7	Acyl homoserine lactone (AHL) autoinducer quorum sensing (AHL)	74	2.40572
		8	Biofilm formation in Staphylococcus (BFS)	22	0.715215
		9	Quorum-sensing in Vibrio (QSV)	9	0.292588
		10	Symbiotic colonization and sigma-dependent biofilm formation gene cluster (SCSIG)	8	0.260078
				3076
		Sl. No.	BF and QS genes in S. aureus	Abundance
		1	Biofilm formation in Staphylococcus	54.55
		2	Autoinducer 2 (AI-2) transport and processing (lsrACDBFGE operon)	27.27
		3	Quorum sensing in Yersinia	18.18
		Sl. No.	BF and QS genes in E. coli	Abundance
		Antibiotic resistance genes
		1	Autoinducer 2 (AI-2) transport and processing (lsrACDBFGE operon)	40.79
		2	Biofilm adhesin biosynthesis	28.59
		3	Protein YjgK cluster linked to biofilm formation	22.31
		4	Quorum sensing: autoinducer-2 synthesis	4.49
		5	Quorum sensing in Yersinia	3.82
		Sl. No.	BF genes in Klebsiella spp.	Abundance
		1	Autoinducer 2 (AI-2) transport and processing (lsrACDBFGE operon)	85.45
		2	Biofilm adhesin biosynthesis	4
		3	Quorum sensing: autoinducer-2 synthesis	10.55
		Sl. No.	BF genes in Enterobacter spp.	Abundance
		Antibiotic resistance genes
		1	Autoinducer 2 (AI-2) transport and processing (lsrACDBFGE operon)	60.98
		2	Protein YjgK cluster linked to biofilm formation	18.29
		3	Quorum sensing in Yersinia	17.07
		4	Quorum sensing regulation in Pseudomonas	3.66
		Sl. No.	BF genes in Shigella spp.	Abundance
		Antibiotic resistance genes
		1	Autoinducer 2 (AI-2) transport and processing (lsrACDBFGE operon)	62.5
		2	Protein YjgK cluster linked to biofilm formation	37.5
			Metabolic Functional Genomics
	KEGG Pathwys Analysis
	level1	level2	level3	function	Relative Abundance
	Cellular Processes	Cell motility	Bacterial chemotaxis	mcp; methyl-accepting chemotaxis protein	44.1674
	Cellular Processes	Cell motility	Bacterial chemotaxis	aer; aerotaxis receptor	7.482
	Cellular Processes	Cell motility	Bacterial chemotaxis	motB; chemotaxis protein MotB	5.212
	Cellular Processes	Cell motility	Bacterial chemotaxis	cheV; two-component system, chemotaxis family, response regulator CheV	4.69978
	Cellular Processes	Cell motility	Bacterial chemotaxis	dppA; dipeptide transport system substrate-binding protein	4.6166
	Cellular Processes	Cell motility	Bacterial chemotaxis	cheB; two-component system, chemotaxis family, response regulator CheB	4.17004
	Cellular Processes	Cell motility	Bacterial chemotaxis	cheA; two-component system, chemotaxis family, sensor kinase CheA	3.35573
	Cellular Processes	Cell motility	Bacterial chemotaxis	motA; chemotaxis protein MotA	3.13027
	Cellular Processes	Cell motility	Bacterial chemotaxis	rbsB; ribose transport system substrate-binding protein	2.86321
	Cellular Processes	Cell motility	Bacterial chemotaxis	cheR; chemotaxis protein methyltransferase CheR	2.76689
	Cellular Processes	Cell motility	Bacterial chemotaxis	fliM; flagellar motor switch protein FliM	2.6662
	Cellular Processes	Cell motility	Bacterial chemotaxis	fliG; flagellar motor switch protein FliG	2.42322
	Cellular Processes	Cell motility	Bacterial chemotaxis	tsr; methyl-accepting chemotaxis protein I, serine sensor receptor	1.94383
	Cellular Processes	Cell motility	Bacterial chemotaxis	cheW; purine-binding chemotaxis protein CheW	1.64394
	Cellular Processes	Cell motility	Bacterial chemotaxis	cheBR; two-component system, chemotaxis family, CheB/CheR fusion protein	1.42066
	Cellular Processes	Cell motility	Bacterial chemotaxis	malE; maltose/maltodextrin transport system substrate-binding protein	1.27619
	Cellular Processes	Cell motility	Bacterial chemotaxis	cheZ; chemotaxis protein CheZ	1.21708
	Cellular Processes	Cell motility	Bacterial chemotaxis	tar; methyl-accepting chemotaxis protein II, aspartate sensor receptor	1.10107
	Cellular Processes	Cell motility	Bacterial chemotaxis	cheY; two-component system, chemotaxis family, response regulator CheY	0.954403
	Cellular Processes	Cell motility	Bacterial chemotaxis	mglB; methyl-galactoside transport system substrate-binding protein	0.853709
	Cellular Processes	Cell motility	Bacterial chemotaxis	fliNY, fliN; flagellar motor switch protein FliN/FliY	0.847142
	Cellular Processes	Cell motility	Bacterial chemotaxis	trg; methyl-accepting chemotaxis protein III, ribose and galactose sensor receptor	0.63262
	Cellular Processes	Cell motility	Bacterial chemotaxis	tap; methyl-accepting chemotaxis protein IV, peptide sensor receptor	0.457501
	Cellular Processes	Cell motility	Bacterial chemotaxis	cheX; chemotaxis protein CheX	0.0591029
	Cellular Processes	Cell motility	Bacterial chemotaxis	cheD; chemotaxis protein CheD	0.028457
	Cellular Processes	Cell motility	Bacterial chemotaxis	cheC; chemotaxis protein CheC	0.010945
	SEED Subsystems Analysis
	level1	level2	level3		abundance
	Regulation and Cell signaling	Regul. virulence	BarA-UvrY(SirA)_two-component_regulatory_system		84.1367
	Regulation and Cell signaling	Regul. virulence	Streptococcal_Mga_Regulon		12.8146
	Regulation and Cell signaling	Regul. virulence	A_conserved_operon_linked_to_TyrR_and_possibly_involved_in_virulence		2.72385
	Regulation and Cell signaling	Regul. virulence	VieSAB_signal_transduction_system_of_Vibrio		0.199306
	Regulation and Cell signaling	Regul. virulence	Streptococcus_pyogenes_virulence_regulators		0.110726
	Regulation and Cell signaling	Regul. virulence	SpeB-SpeF_extended_regulon		0.0147634
	level1	level2	level3		abundance
	Regulation and Cell signaling	Programmed Cell Death and Toxin-antitoxin Systems	Murein_hydrolase_regulation_and_cell_death		54.0424
	Regulation and Cell signaling	Programmed Cell Death and Toxin-antitoxin Systems	Toxin-antitoxin_systems_(other_than_RelBE_and_MazEF)		17.1901
	Regulation and Cell signaling	Programmed Cell Death and Toxin-antitoxin Systems	Phd-Doc,_YdcE-YdcD_toxin-antitoxin_(programmed_cell_death)_systems		15.4366
	Regulation and Cell signaling	Programmed Cell Death and Toxin-antitoxin Systems	Toxin-antitoxin_replicon_stabilization_systems		10.6576
	Regulation and Cell signaling	Programmed Cell Death and Toxin-antitoxin Systems	MazEF_toxin-antitoxing_(programmed_cell_death)_system		2.35717
	Regulation and Cell signaling	Programmed Cell Death and Toxin-antitoxin Systems	A_toxin-antitoxin_module_cotranscribed_with_DinB		0.309019
	Regulation and Cell signaling	Programmed Cell Death and Toxin-antitoxin Systems	Toxin-Antitoxin_MT1		0.00718649
	level1	level2	level3	function	Relative Abundance
	Regulation and Cell signaling	Proteolytic pathway	Regulatory_Intramembrane_Proteolysis_Pathways	Endoplasmic reticulum chaperon grp78 (BiP)	93.8144
	Regulation and Cell signaling	Proteolytic pathway	Regulatory_Intramembrane_Proteolysis_Pathways	Endoribonuclease (EC 3.1.26.-) IRE1	1.03093
	Regulation and Cell signaling	Proteolytic pathway	Regulatory_Intramembrane_Proteolysis_Pathways	Endoribonuclease (EC 3.1.26.-) IRE2	1.03093
	Regulation and Cell signaling	Proteolytic pathway	Regulatory_Intramembrane_Proteolysis_Pathways	Eukaryotic translation initiation factor 2-alpha kinase 1 (HRI)	1.03093
	Regulation and Cell signaling	Proteolytic pathway	Regulatory_Intramembrane_Proteolysis_Pathways	Sterol regulatory element binding transcription factor	3.09278
	level1	level2	level3	function	Relative Abundance
	Phages, Prophages, Transposable elements, Plasmids	Pathogenicity islands	Staphylococcal_pathogenicity_islands_SaPI	Methionine ABC transporter substrate-binding protein	33.8175
	Phages, Prophages, Transposable elements, Plasmids	Pathogenicity islands	Staphylococcal_pathogenicity_islands_SaPI	GMP synthase [glutamine-hydrolyzing] (EC 6.3.5.2)	27.7328
	Phages, Prophages, Transposable elements, Plasmids	Pathogenicity islands	Staphylococcal_pathogenicity_islands_SaPI	tmRNA-binding protein SmpB	16.0832
	Phages, Prophages, Transposable elements, Plasmids	Pathogenicity islands	Staphylococcal_pathogenicity_islands_SaPI	Heat shock protein 60 family chaperone GroEL	15.9914
	Phages, Prophages, Transposable elements, Plasmids	Pathogenicity islands	Staphylococcal_pathogenicity_islands_SaPI	SSU ribosomal protein S18p	6.13056
	Phages, Prophages, Transposable elements, Plasmids	Pathogenicity islands	Staphylococcal_pathogenicity_islands_SaPI	Putative primase, superantigen-encoding pathogenicity islands SaPI	0.214035
	Phages, Prophages, Transposable elements, Plasmids	Pathogenicity islands	Staphylococcal_pathogenicity_islands_SaPI	Hypothetical SAV0792 homolog in superantigen-encoding pathogenicity islands SaPI	0.0152882
	Phages, Prophages, Transposable elements, Plasmids	Pathogenicity islands	Staphylococcal_pathogenicity_islands_SaPI	Integrase, superantigen-encoding pathogenicity islands SaPI	0.0152882
	level1	level2	level3	function	Relative Abundance
	Stress Response	Oxidative stress	Oxidative_stress	Catalase (EC 1.11.1.6)	20.6591
	Stress Response	Oxidative stress	Oxidative_stress	Superoxide dismutase [Fe] (EC 1.15.1.1)	8.84
	Stress Response	Oxidative stress	Oxidative_stress	Hydrogen peroxide-inducible genes activator	7.84966
	Stress Response	Oxidative stress	Oxidative_stress	Paraquat-inducible protein B	7.37885
	Stress Response	Oxidative stress	Oxidative_stress	Alkyl hydroperoxide reductase subunit C-like protein	6.92426
	Stress Response	Oxidative stress	Oxidative_stress	Nitrite-sensitive transcriptional repressor NsrR	6.16121
	Stress Response	Oxidative stress	Oxidative_stress	Paraquat-inducible protein A	6.16121
	Stress Response	Oxidative stress	Oxidative_stress	Phytochrome, two-component sensor histidine kinase (EC 2.7.3.-)	5.28452
	Stress Response	Oxidative stress	Oxidative_stress	Fumarate and nitrate reduction regulatory protein	4.03442
	Stress Response	Oxidative stress	Oxidative_stress	Peroxidase (EC 1.11.1.7)	3.53113
	Stress Response	Oxidative stress	Oxidative_stress	Manganese superoxide dismutase (EC 1.15.1.1)	3.34443
	Stress Response	Oxidative stress	Oxidative_stress	Ferric uptake regulation protein FUR	2.97914
	Stress Response	Oxidative stress	Oxidative_stress	transcriptional regulator, Crp/Fnr family	2.24856
	Stress Response	Oxidative stress	Oxidative_stress	Ferroxidase (EC 1.16.3.1)	2.07809
	Stress Response	Oxidative stress	Oxidative_stress	Organic hydroperoxide resistance protein	1.92386
	Stress Response	Oxidative stress	Oxidative_stress	Iron-binding ferritin-like antioxidant protein	1.88327
	Stress Response	Oxidative stress	Oxidative_stress	bacteriophytochrome heme oxygenase BphO	1.81833
	Stress Response	Oxidative stress	Oxidative_stress	Redox-sensitive transcriptional activator SoxR	1.76962
	Stress Response	Oxidative stress	Oxidative_stress	Zinc uptake regulation protein ZUR	1.46116
	Stress Response	Oxidative stress	Oxidative_stress	Fe2+/Zn2+ uptake regulation proteins	1.26634
	Stress Response	Oxidative stress	Oxidative_stress	Heme oxygenase HemO, associated with heme uptake	0.95787
	Stress Response	Oxidative stress	Oxidative_stress	Regulatory protein SoxS	0.576345
	Stress Response	Oxidative stress	Oxidative_stress	Superoxide dismutase [Cu-Zn] precursor (EC 1.15.1.1)	0.275996
	Stress Response	Oxidative stress	Oxidative_stress	Superoxide dismutase [Mn] (EC 1.15.1.1)	0.211056
	Stress Response	Oxidative stress	Oxidative_stress	Metallothionein	0.186703
	Stress Response	Oxidative stress	Oxidative_stress	Redox-sensitive transcriptional regulator (AT-rich DNA-binding protein)	0.178586
	Stress Response	Oxidative stress	Oxidative_stress	Peroxide stress regulator	0.00811754
	Stress Response	Oxidative stress	Oxidative_stress	Superoxide dismutase [Mn/Fe] (EC 1.15.1.1)	0.00811754
	level1	level2	level3	function	Relative Abundance
	Motility and Chemotaxis	Flagellar motility in Prokaryota	Flagellum	Flagellar hook-length control protein FliK	27.1685
	Motility and Chemotaxis	Flagellar motility in Prokaryota	Flagellum	Flagellar M-ring protein FliF	5.61943
	Motility and Chemotaxis	Flagellar motility in Prokaryota	Flagellum	Flagellar regulatory protein FleQ	5.33201
	Motility and Chemotaxis	Flagellar motility in Prokaryota	Flagellum	Flagellar P-ring protein FlgI	4.25234
	Motility and Chemotaxis	Flagellar motility in Prokaryota	Flagellum	Flagellar hook-associated protein FlgL	3.6296
	Motility and Chemotaxis	Flagellar motility in Prokaryota	Flagellum	Flagellar hook protein FlgE	3.6038
	Motility and Chemotaxis	Flagellar motility in Prokaryota	Flagellum	Flagellar biosynthesis protein FlhA	3.57432
	Motility and Chemotaxis	Flagellar motility in Prokaryota	Flagellum	Flagellar hook-associated protein FliD	2.91473
	Motility and Chemotaxis	Flagellar motility in Prokaryota	Flagellum	Flagellar biosynthesis protein FliL	2.75997
	Motility and Chemotaxis	Flagellar motility in Prokaryota	Flagellum	Flagellar motor switch protein FliG	2.6052
	Motility and Chemotaxis	Flagellar motility in Prokaryota	Flagellum	Flagellar protein FlgJ [peptidoglycan hydrolase] (EC 3.2.1.-)	2.50571
	Motility and Chemotaxis	Flagellar motility in Prokaryota	Flagellum	Flagellar basal-body rod protein FlgF	2.42096
	Motility and Chemotaxis	Flagellar motility in Prokaryota	Flagellum	Flagellar basal-body rod protein FlgG	2.29567
	Motility and Chemotaxis	Flagellar motility in Prokaryota	Flagellum	Flagellar sensor histidine kinase FleS	2.09669
	Motility and Chemotaxis	Flagellar motility in Prokaryota	Flagellum	Flagellar basal-body P-ring formation protein FlgA	1.97509
	Motility and Chemotaxis	Flagellar motility in Prokaryota	Flagellum	Flagellar assembly protein FliH	1.88665
	Motility and Chemotaxis	Flagellar motility in Prokaryota	Flagellum	Flagellar motor rotation protein MotB	1.74294
	Motility and Chemotaxis	Flagellar motility in Prokaryota	Flagellum	Flagellar biosynthesis protein FliP	1.72452
	Motility and Chemotaxis	Flagellar motility in Prokaryota	Flagellum	RNA polymerase sigma factor RpoD	1.485
	Motility and Chemotaxis	Flagellar motility in Prokaryota	Flagellum	Flagellar synthesis regulator FleN	1.40394
	Motility and Chemotaxis	Flagellar motility in Prokaryota	Flagellum	RNA polymerase sigma-54 factor RpoN	1.3892
	Motility and Chemotaxis	Flagellar motility in Prokaryota	Flagellum	Flagellar protein FliJ	1.33761
	Motility and Chemotaxis	Flagellar motility in Prokaryota	Flagellum	Flagellar biosynthesis protein FlhF	1.29707
	Motility and Chemotaxis	Flagellar motility in Prokaryota	Flagellum	RNA polymerase sigma factor for flagellar operon	1.25286
	Motility and Chemotaxis	Flagellar motility in Prokaryota	Flagellum	Flagellar biosynthesis protein FlgN	1.23443
	Motility and Chemotaxis	Flagellar motility in Prokaryota	Flagellum	Flagellar biosynthesis protein FliS	1.20495
	Motility and Chemotaxis	Flagellar motility in Prokaryota	Flagellum	Flagellar biosynthesis protein FlhB	0.9986
	Motility and Chemotaxis	Flagellar motility in Prokaryota	Flagellum	Flagellar biosynthesis protein FliO	0.972806
	Motility and Chemotaxis	Flagellar motility in Prokaryota	Flagellum	Flagellar basal-body rod modification protein FlgD	0.954381
	Motility and Chemotaxis	Flagellar motility in Prokaryota	Flagellum	Flagellar biosynthesis protein FliQ	0.935957
	Motility and Chemotaxis	Flagellar motility in Prokaryota	Flagellum	Flagellin protein FlaB	0.902793
	Motility and Chemotaxis	Flagellar motility in Prokaryota	Flagellum	Flagellar basal-body rod protein FlgB	0.869629
	Motility and Chemotaxis	Flagellar motility in Prokaryota	Flagellum	Negative regulator of flagellin synthesis FlgM	0.759083
	Motility and Chemotaxis	Flagellar motility in Prokaryota	Flagellum	Flagellar motor switch protein FliM	0.733289
	Motility and Chemotaxis	Flagellar motility in Prokaryota	Flagellum	Flagellar biosynthesis protein FliC	0.678016
	Motility and Chemotaxis	Flagellar motility in Prokaryota	Flagellum	Flagellar L-ring protein FlgH	0.508512
	Motility and Chemotaxis	Flagellar motility in Prokaryota	Flagellum	Flagellar hook-basal body complex protein FliE	0.453239
	Motility and Chemotaxis	Flagellar motility in Prokaryota	Flagellum	Flagellin protein FlaA	0.453239
	Motility and Chemotaxis	Flagellar motility in Prokaryota	Flagellum	Flagellar motor switch protein FliN	0.43113
	Motility and Chemotaxis	Flagellar motility in Prokaryota	Flagellum	Flagellar basal-body rod protein FlgC	0.379542
	Motility and Chemotaxis	Flagellar motility in Prokaryota	Flagellum	Flagellar transcriptional activator FlhC	0.316899
	Motility and Chemotaxis	Flagellar motility in Prokaryota	Flagellum	Flagellar biosynthesis protein FliZ	0.232147
	Motility and Chemotaxis	Flagellar motility in Prokaryota	Flagellum	Negative regulator of flagellin synthesis	0.180559
	Motility and Chemotaxis	Flagellar motility in Prokaryota	Flagellum	Flagellar biosynthesis protein FliT	0.176874
	Motility and Chemotaxis	Flagellar motility in Prokaryota	Flagellum	Flagellar transcriptional activator FlhD	0.14371
	Motility and Chemotaxis	Flagellar motility in Prokaryota	Flagellum	Flagellar protein FlhE	0.132655
	Motility and Chemotaxis	Flagellar motility in Prokaryota	Flagellum	Flagellin protein FlaG	0.0589579
	Motility and Chemotaxis	Flagellar motility in Prokaryota	Flagellum	Flagellar protein FlbD	0.0147395
